# Supplementary material for: Biological activity of Dittrichia viscosa (L.) Greuter extracts against adult Sitophilus granarius (L.) (Coleoptera, Curculionidae) and identification of active compounds
Source: PubMed Central journal article supplement (PMC6478880; doi:10.1038/s41598-019-42886-4), 2019-04-23
Supplement: 41598_2019_42886_MOESM1_ESM.pdf [file 41598_2019_42886_MOESM1_ESM.pdf]

## **Biological activity of *Dittrichia viscosa* (L.) Greuter extracts against adult *Sitophilus granarius* (L.) (Coleoptera, Curculionidae) and identification of active compounds**

Giuseppe Rotundo<sup>1\*</sup>, Gianluca Paventi<sup>2\*</sup>, Antonia Barberio<sup>1</sup>, Antonio De Cristofaro<sup>1</sup>, Ivan Notardonato<sup>1</sup>, Mario V. Russo<sup>1</sup>, Giacinto S. Germinara<sup>3</sup>

<sup>1</sup> *Department of Agricultural, Environmental and Food Sciences - University of Molise, via de Sanctis, 86100 Campobasso, Italy*

<sup>2</sup> *Department of Medicine and Health Sciences “V. Tiberio” - University of Molise, via de Sanctis, 86100 Campobasso, Italy*

<sup>3</sup> *Department of the Sciences of Agriculture, Food and Environment - University of Foggia, Via Napoli 25, 71100 Foggia, Italy*

\*corresponding authors:

- Giuseppe Rotundo, [rotundo@unimol.it](mailto:rotundo@unimol.it), 0039(0)874 404869

- Gianluca Paventi, [paventi@unimol.it](mailto:paventi@unimol.it), 0039(0)874 404779, <http://orcid.org/0000-0003-3673-0091>

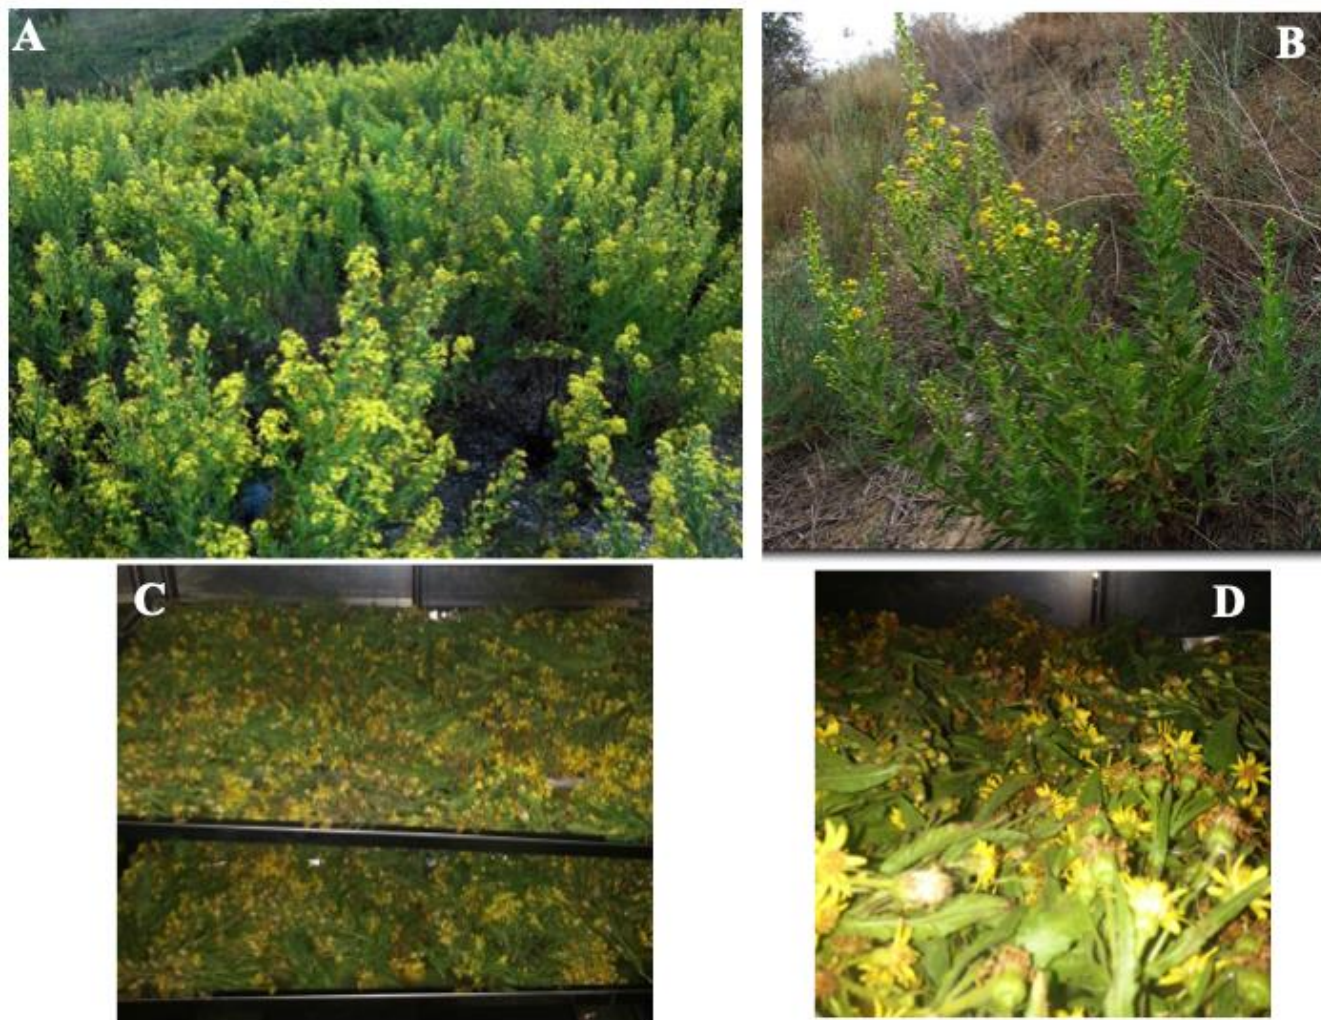

**Supplementary Fig. S1.** *D. viscosa* plants (insets A, B) in the site of sampling, a rural area near Campobasso, Molise region, Italy (650 m a.s.l.); particular showing the aerial part collected to be dried and ground for solvent extraction (insets C, D).

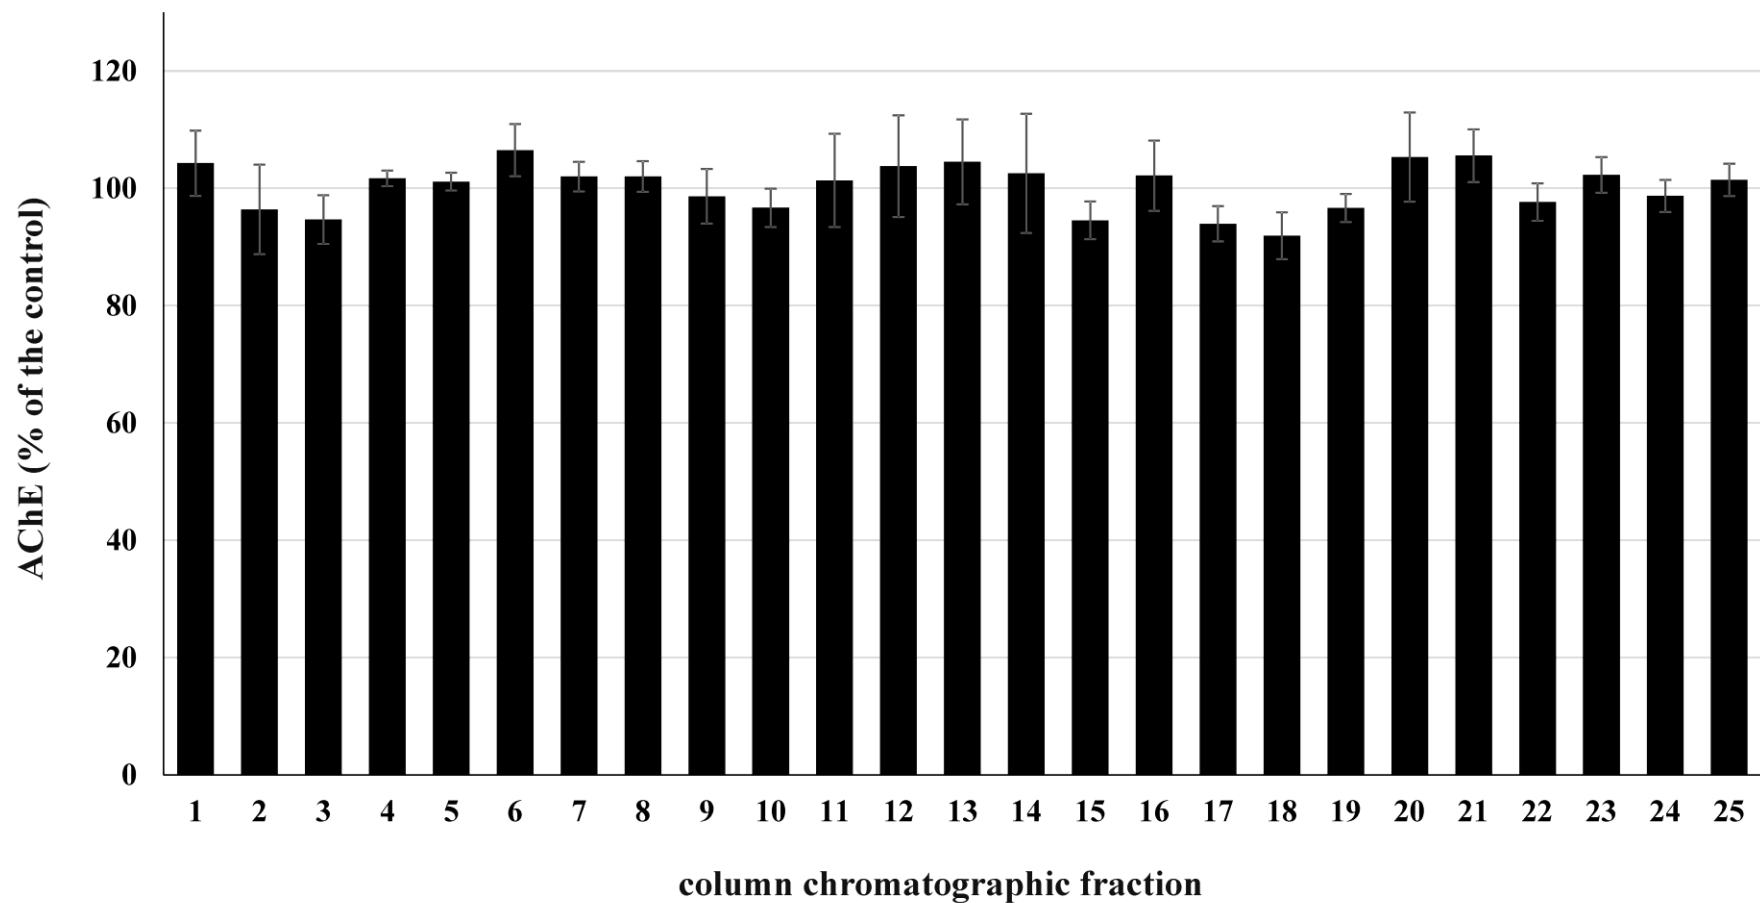

**Supplementary Fig. S2.** Mean values ( $\pm$  SE) of AChE activity (commercial enzyme) obtained in the presence of different chromatographic fractions (3 mg/ml) of n-hexane extract of *D. viscosa*. Values (3 for each fraction) were calculated as % of the control (enzyme activity measured in the absence of fraction). No significant differences at  $P = 0.05$  (Tukey HSD test) for all fractions were found.
